# Supplementary material
Source: publisher site journal article supplement (https://www.dovepress.com/article/456170)
Supplement: Supplementary file 1 [file get_supplementary_file.php]

**Supplementary Table 1** Codes used in study

| **Characteristic** | **Anatomical Therapeutic Chemical (ATC) codes** | | | **Int. Classification of Diseases-10 codes** | **Surgical procedure codes** | **Laboratory codes** |
| --- | --- | --- | --- | --- | --- | --- |
| **Weight loss medications** |  |  | *+ product name* |  |  |  |
|  | Liraglutide | A10BJ02, A10BX07 | Saxenda |  |  |  |
| Semaglutide | A10BJ06 | Wegovy |  |  |  |
| Orlistat | A08AB01 | Orlistat, Xenical, Alli |  |  |  |
| Amfepramone | A08AA03 | Regenon, Regenon retard |  |  |  |
| Buproprion/Naltrexone | A08AA62 | Mysimba |  |  |  |
| **Diabetes indicators** | Liraglutide | A10BJ02, A10BX07 | Victoza | E10-E14, O240-O243, H360 |  | NPU27300, NPU03835 (HbA1c) |
|  | Semaglutide | A10BJ06 | Ozempic, Rybelsus |  |  |
|  | Any GLP-1RA | A10BJ, A10BX04, A10BX07, A10BX10, A10BX13, A10BX14 |  |  |  |
|  | Insulin | A10A |  |  |  |
|  | Glucose-lowering medications, excluding insulin | A10B |  |  |  |
|  | Metformin | A10BA02, A10BD02, A10BD03, A10BD05, A10BD07, A10BD08, A10BD10, A10BD11, A10BD13, A10BD14, A10BD15, A10BD16, A10BD17, A10BD18, A10BD20, A10BD22, A10BD23, A10BD25, A10BD26, A10BD27 |  |  |  |
|  | SGLT-2i | A10BK, A10BD15, A10BD21, A10BD25, A10BD16, A10BD19, A10BD20, A10BD27, A10BD23, A10BD24, A10BX09, A10BX11, A10BX12 |  |  |  |
|  | DPP-4i | A10BH, A10BD07, A10BD12, A10BD24, A10BD08, A10BD10, A10BD21, A10BD25, A10BD09, A10BD13, A10BD11, A10BD19, A10BD27, A10BD18, A10BD22 |  |  |  |
| **Ischemic heart disease** |  |  |  | I20-I25, T822A, T823 | KFNA, KFNB, KFNC, KFND, KFNE,  KFNF, KFNG, KFNH, KFNW, KFLF |  |
| **Atherosclerotic cerebrovascular disease** |  |  |  | I63-I66, I672, I678-I679, I691, I693-I698, G45 | KAAL10, KAAL11 |  |
| **Atherosclerotic peripheral vascular disease** |  |  |  | I702, I742-I745, I739A, I739B, I739C | KPBE+F+H+N+P+Q, KPBW, KPGH10, KPDE+F+H+N+P+Q, KPDW99, KPDW20, KPEE+F+H+N+P+Q+W, KPFE+H+N+P+Q+W, KPGH20+21+22+23+30+31+40+99, KPDU74+82+83+84, KPEU74+82+83+84, KPFU74+82+83+84, KNBQ, KNCQ, KNDQ, KNEQ, KNFQ, KNGQ, KNHQ |  |
| **Kidney disease** |  |  |  | E102, E112, E122, E132, E142, I12, I13, N02, N06, N07, N083, N11, N14, N150, N16, N17-N19, O084, R809, Q61, T861, Z940, Z992 | BJFD2, BJFD0 (treatment codes), KKAS |  |
